# Supplementary material
Source: publisher figshare collection journal article supplement (https://frontiersin.figshare.com/ndownloader/files/22882646)
Supplement: Supplementary file [file 22882646]

Supplement 1. The unique relationship of the measured variables with acceptance of sugar relationships; results of a multiple linear regression analysis.

|             |                          | $\beta$ | VIF   | $R^2$ |
|-------------|--------------------------|---------|-------|-------|
|             | Personal Goal Attainment | .055    | 2.777 |       |
| YSEX?-HSF   | Relational reasons       | - .174* | 1.408 |       |
|             | Sex as coping            | .166*   | 2.044 |       |
| SOI-R Total |                          | .279**  | 2.289 |       |
|             | Eros                     | .011    | 1.354 | .41** |
|             | Ludus                    | .283**  | 1.807 |       |
|             | Storge                   | .011    | 1.031 |       |
| LAS-SF      | Pragma                   | - .017  | 1.062 |       |
|             | Mania                    | .057    | 1.233 |       |
|             | Agape                    | - .085  | 1.220 |       |

Note: VIF = vector inflation factor; \*  $p < .01$ , \*\*  $p < .001$ . YSEX?-HSF = Why Have Sex - Hungarian Short Form. SOI-R = Revised Sociosexual Orientation Inventory. LAS-SF = Love Attitude Scale - Short Form.

Supplement 2. The unique relationship of the measured variables with acceptance of sugar relationships; results of a multiple linear regression analysis.

|     |                         | $\beta$ | VIF   | $R^2$ |
|-----|-------------------------|---------|-------|-------|
|     | Machiavellianism        | .194**  | 1.670 |       |
| SD3 | Subclinical Psychopathy | .133**  | 2.054 |       |
|     | Subclinical Narcissism  | .082*   | 1.269 | .17** |
| BPI |                         | .142**  | 1.326 |       |

Note: VIF = vector inflation factor; \*  $p < .01$ , \*\*  $p < .001$ . SD3 = Short Dark Triad. BPI = Borderline Personality Inventory.
